# Supplementary material
Source: publisher figshare collection journal article supplement (https://frontiersin.figshare.com/ndownloader/files/14055251)
Supplement: Supplementary file [file 14055251]

**TABLE S1** | Illumina MiSeq sequenced fungal data (at 97% sequence similarity) based on the ITS rRNA gene in the three soybean cropping systems.

|    | <b>Sequences</b> | <b>Bases(bp)</b> | <b>Average Length</b> | <b>Minimum length</b> | <b>Maximun length</b> |
|----|------------------|------------------|-----------------------|-----------------------|-----------------------|
| RS | 32010            | 8481468          | 265                   | 211                   | 412                   |
| SS | 37889            | 9701521          | 256                   | 215                   | 435                   |
| CS | 39762            | 10165547         | 256                   | 216                   | 435                   |
